# Supplementary material for: In vitro and in vivo effects of the PPAR-alpha agonists fenofibrate and retinoic acid in endometrial cancer
Source: PubMed Central journal article supplement (PMC1475879; doi:10.1186/1476-4598-5-13), 2006-03-28
Supplement: 1476-4598-5-13-S1.pdf [file 1476-4598-5-13-S1.pdf]

## Supplementary Information

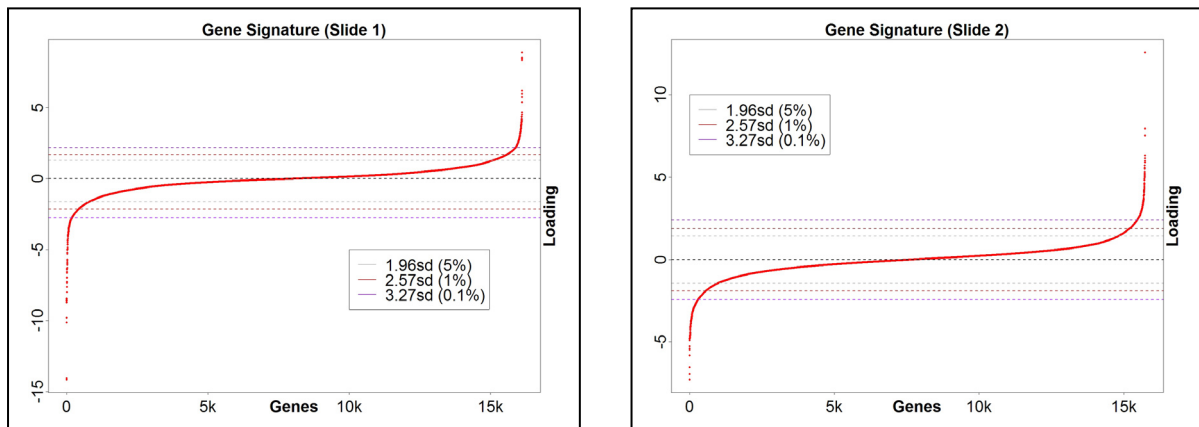

**Figure 1:** Identification of significant genes based on component loadings for the ICA component of interest. Genes with loadings lying outside the 0.1% (3.27sd) line are considered to be significantly differentially expressed. This threshold corresponds the inflexion of the loading curve plotted as above

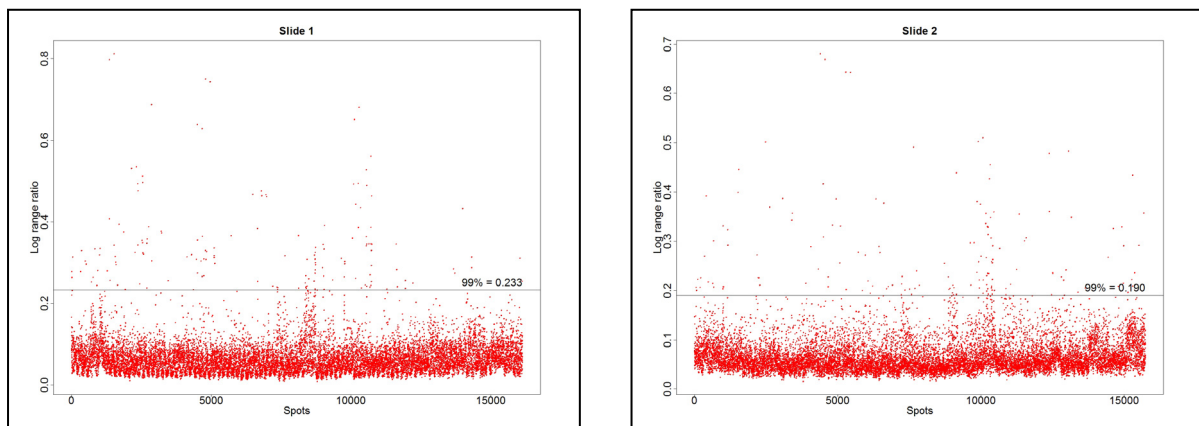

**Figure 2:** Quality Control validation of gene arrays. The standard deviation of the  $\log_{10}$  signals from the 15 control gene arrays (hybridised from the same pooled DNA, Cy3 channel) are plotted for each slide. For each slide, the 99<sup>th</sup> centile of the standard deviations are also plotted (horizontal line). 99% of the spots demonstrate a calculated range ratio of  $\leq 1.7$  (Slide 1) or  $\leq 1.6$  (Slide 2). The range ratio signifies the ratio of the “estimated highest signal” to “estimated lowest signal” (ISO5725 reproducibility limits) for each spot, derived from the 95% Confidence Interval of the logged signal ( $10^{4s/\sqrt{n}}$  where  $n=15$  samples,  $s$ =standard deviation of log signal).
